# Supplementary material for: RNA Expression Signatures of Intracranial Aneurysm Growth Trajectory Identified in Circulating Whole Blood
Source: MDPI journal article supplement (doi:10.3390/jpm13020266), 2023-01-31
Supplement: s1 [file s1]

# **Supplemental Information for: RNA Expression Signatures of Intracranial Aneurysm Growth Trajectory Identified in Circulating Whole Blood**

Kerry E. Poppenberg PhD<sup>1,2</sup>, Aichi Chien PhD<sup>4</sup>, Briana A. Santo BS<sup>1,3</sup>, Ammad A. Baig MD<sup>1,2</sup>, Andre Monteiro MD<sup>1,2</sup>, Adam A. Dmytriw MD MPH MSc<sup>5</sup>, Jan-Karl Burkhardt MD<sup>6</sup>, Maxim Mokin MD-PhD<sup>7</sup>, Kenneth V. Snyder MD-PhD<sup>1,2</sup>, Adnan H. Siddiqui MD-PhD<sup>1,2</sup>, Vincent M. Tutino PhD<sup>1,2,3</sup>

<sup>1</sup>Canon Stroke and Vascular Research Center; <sup>2</sup>Department of Neurosurgery, <sup>3</sup>Department of Pathology and Anatomical Sciences, University at Buffalo, Buffalo, NY, USA

<sup>4</sup>Department of Radiology, University of California Los Angeles, Los Angeles, CA, USA

<sup>5</sup>Neuroendovascular Program, Massachusetts General Hospital, Harvard Medical School, Boston, MA, USA

<sup>6</sup>Department of Neurosurgery, University of Pennsylvania, Philadelphia, PA, USA

<sup>7</sup>Department of Neurosurgery, University of South Florida, Tampa, FL, USA

## **\* Corresponding Author:**

Vincent M. Tutino, PhD

875 Ellicott Street

Canon Stroke and Vascular Research Center

University at Buffalo

Buffalo, NY 14203, USA

E-mail: [vincentt@buffalo.edu](mailto:vincentt@buffalo.edu)

Phone: (716) 829-5400

## Supplemental Tables

**Supplemental Table S1. RNA Quality and Sequencing QC Metrics.\***

| <b>Sample ID</b> | <b>260/280</b> | <b>RIN</b> | <b>% Assigned</b> | <b>M Assigned</b> | <b>% Aligned</b> |
|------------------|----------------|------------|-------------------|-------------------|------------------|
| 1                | 2.04           | 10.00      | 0.271             | 15.1              | 0.96             |
| 2                | 2.00           | 8.77       | 0.192             | 16.0              | 0.957            |
| 3                | 2.00           | 8.46       | 0.228             | 24.1              | 0.965            |
| 4                | 2.00           | 8.46       | 0.181             | 20.9              | 0.963            |
| 5                | 1.85           | 8.25       | 0.206             | 13.7              | 0.959            |
| 6                | 2.03           | 9.49       | 0.237             | 18.3              | 0.965            |
| 7                | 1.98           | 9.49       | 0.218             | 17.3              | 0.965            |
| 8                | 1.98           | 9.59       | 0.277             | 17.6              | 0.95             |
| 9                | 1.66           | 7.40       | 0.202             | 10.4              | 0.958            |
| 10               | 1.87           | 6.70       | 0.040             | 8.0               | 0.98             |
| 11               | 1.93           | 6.50       | 0.226             | 15.0              | 0.968            |
| 12               | 2.04           | 9.38       | 0.240             | 18.4              | 0.967            |
| 13               | 2.06           | 8.90       | 0.219             | 19.3              | 0.968            |
| 14               | 2.01           | 9.80       | 0.249             | 14.5              | 0.964            |
| 15               | 1.92           | 7.60       | 0.253             | 15.1              | 0.962            |
| 16               | 1.92           | 6.00       | 0.221             | 14.5              | 0.951            |
| 17               | 1.95           | 6.80       | 0.284             | 16.3              | 0.962            |
| 18               | 1.97           | 9.20       | 0.277             | 19.2              | 0.955            |
| 19               | 2.04           | 8.90       | 0.230             | 15.1              | 0.964            |
| 20               | 2.02           | 7.20       | 0.242             | 20.2              | 0.961            |
| 21               | 1.95           | 6.10       | 0.093             | 15.6              | 0.974            |
| 22               | 1.96           | 8.90       | 0.120             | 18.3              | 0.972            |
| 23               | 1.96           | 6.10       | 0.230             | 9.3               | 0.962            |
| 24               | 1.96           | 7.84       | 0.224             | 15.9              | 0.954            |
| 25               | 2.06           | 9.00       | 0.252             | 17.9              | 0.962            |
| 26               | 2.03           | 9.10       | 0.268             | 25.2              | 0.964            |
| 27               | 2.02           | 9.00       | 0.266             | 21.5              | 0.961            |
| 28               | 1.97           | 7.90       | 0.241             | 17.5              | 0.966            |
| 29               | 2.04           | 9.38       | 0.252             | 24.1              | 0.963            |
| 30               | 2.02           | 9.07       | 0.246             | 9.7               | 0.971            |
| 31               | 2.05           | 9.07       | 0.243             | 11.0              | 0.973            |
| 32               | 2.04           | 8.97       | 0.248             | 11.6              | 0.974            |
| 33               | 1.92           | 8.66       | 0.265             | 10.8              | 0.974            |
| 34               | 2.03           | 9.07       | 0.263             | 11.7              | 0.974            |
| 35               | 2.07           | 8.56       | 0.237             | 22.9              | 0.966            |
| 36               | 2.03           | 8.77       | 0.255             | 12.8              | 0.971            |
| 37               | 2.06           | 9.28       | 0.246             | 10.4              | 0.971            |

|    |      |      |       |      |       |
|----|------|------|-------|------|-------|
| 38 | 2.06 | 9.18 | 0.25  | 12.3 | 0.971 |
| 39 | 1.97 | 8.15 | 0.235 | 9.2  | 0.972 |
| 40 | 2.03 | 8.87 | 0.257 | 12.8 | 0.968 |
| 41 | 1.97 | 9.69 | 0.225 | 7.3  | 0.969 |
| 42 | 2.05 | 9.07 | 0.270 | 6.6  | 0.969 |
| 43 | 2.05 | 8.56 | 0.269 | 14.2 | 0.972 |
| 44 | 1.99 | 8.66 | 0.258 | 11.3 | 0.97  |
| 45 | 2.05 | 8.77 | 0.259 | 10.7 | 0.971 |
| 46 | 2.06 | 8.46 | 0.254 | 10.5 | 0.97  |
| 47 | 2.04 | 8.15 | 0.266 | 10.5 | 0.972 |
| 48 | 2.03 | 8.15 | 0.264 | 12.4 | 0.967 |
| 49 | 1.77 | 8.15 | 0.253 | 10.0 | 0.969 |
| 50 | 2.04 | 9.18 | 0.242 | 13.7 | 0.969 |
| 51 | 1.82 | 8.04 | 0.281 | 16.6 | 0.967 |
| 52 | 2.04 | 8.04 | 0.247 | 14.0 | 0.971 |
| 53 | 2.06 | 8.87 | 0.225 | 11.9 | 0.968 |
| 54 | 2.01 | 8.97 | 0.255 | 11.5 | 0.972 |
| 55 | 2.09 | 7.63 | 0.307 | 12.6 | 0.966 |
| 56 | 1.98 | 8.15 | 0.263 | 12.4 | 0.974 |
| 57 | 2.04 | 8.97 | 0.270 | 10.5 | 0.969 |
| 58 | 1.95 | 8.56 | 0.232 | 14.3 | 0.967 |
| 59 | 1.05 | 7.94 | 0.289 | 12.6 | 0.967 |
| 60 | 2.01 | 7.94 | 0.230 | 9.8  | 0.973 |
| 61 | 2.05 | 8.66 | 0.246 | 11.6 | 0.965 |
| 62 | 2.05 | 8.46 | 0.280 | 11.6 | 0.953 |
| 63 | 1.77 | 8.87 | 0.278 | 11.9 | 0.967 |
| 64 | 2.05 | 8.56 | 0.257 | 10.7 | 0.97  |
| 65 | 2.06 | 7.73 | 0.260 | 12.1 | 0.967 |
| 66 | 2.01 | 8.77 | 0.216 | 19.7 | 0.96  |

---

\* “Assigned” refers to alignments assigned to genome features, whereas “aligned” refers to aligned reads that overlap genes. Abbreviations: QC=quality control, RIN=RNA integrity number, M=million

**Supplemental Table S2. IPA Networks for PAT-Associated Differentially Expressed Genes.\***

| <b>ID</b> | <b>Molecules in Network</b>                                                                                                                                                                                                                                                                                                                       | <b>P-Score</b> | <b># Focus Molecules</b> | <b>Top Diseases and Functions</b>                                                                |
|-----------|---------------------------------------------------------------------------------------------------------------------------------------------------------------------------------------------------------------------------------------------------------------------------------------------------------------------------------------------------|----------------|--------------------------|--------------------------------------------------------------------------------------------------|
| 1         | 17, 18-dihydroxyeicosapentaenoic acid, ACKR2, Akt, AMPK, C1QL3, DEFA1 (includes others), DYRK3, ERK1/2, FAM83A, FGFR2, FSH, Growth hormone, GSTM1, HBA1/HBA2, Histone h3, IFI27, Immunoglobulin, Insulin, ITLN1, LPL, NDUFC1, NFkB (complex), P38 MAPK, Pka, PRRT4, RAP1GAP, RBFOX2, ribose, RNF152, SFRP2, SLC2A14, SLC2A4, TMIGD3, USP12, ZMAT4 | 49             | 19                       | Dermatological diseases and conditions, nutritional disease, organismal injury and abnormalities |
| 2         | ALKBH5, APP, ARHGAP42, ARHGEF37, ARL4A, ARMC12, ART4, ATP1B1, CRK, CYP51A1, DDX39A, DKK2, FLRT3, FZD3, glycosylphosphatidylinositol, GOLGA8K (includes others), HSPA8, Hspg, MAP1A, MPZ, OGT, OTOF, P2RX6, PAQR9, PIWIL4, RNF182, RUNDC3A, SDHD, SHOX2, TBCEL, TGFB1, THOC6, TLL1, TSNAXIP1, VIM                                                  | 25             | 11                       | Cardiovascular system development and function, cellular movement, molecular transport           |

\*Abbreviations: IPA=Ingenuity Pathway Analysis, PAT=predicted aneurysm trajectory

**Supplemental Table S3. Significant IPA Disease and Biological Functions for PAT-Associated Differentially Expressed Genes.\***

| <b>Categories</b>                           | <b>Diseases or Functions Annotation</b> | <b><i>p</i>-value</b> | <b>Molecules [#]</b>                                                                                                                                                                                                                                                                                                                    |
|---------------------------------------------|-----------------------------------------|-----------------------|-----------------------------------------------------------------------------------------------------------------------------------------------------------------------------------------------------------------------------------------------------------------------------------------------------------------------------------------|
| Cancer, Organismal Injury and Abnormalities | Carcinoma                               | 0.000131              | ACKR2, ARHGAP42, ARHGEF37, ARL4A, ART4, DEFA1 (includes others), DYRK3, FAM83A, FGFR2, GOLGA8K (includes others), GSTM1, HBA1/HBA2, HEPACAM2, IFI27, IFI44L, ITLN1, LPL, LRRC2, OTOF, PAQR9, PRRT4, RAP1GAP, RBFOX2, RNF152, RNF182, RUNDC3A, SFRP2, SHISA4, SLC2A4, TBCEL, THEM5, TMEM158, TMIGD3, TSNAXIP1, UBXN10, USP12, ZMAT4 [37] |
| Cancer, Organismal Injury and Abnormalities | Extracranial solid tumor                | 0.000512              | ACKR2, ARHGAP42, ARHGEF37, ARL4A, ART4, DEFA1 (includes others), DYRK3, FAM83A, FGFR2, GOLGA8K (includes others), GSTM1, HBA1/HBA2, HEPACAM2, IFI27, IFI44L, ITLN1, LPL, LRRC2, OTOF, PAQR9, PRRT4, RAP1GAP, RBFOX2, RNF152, RNF182, RUNDC3A, SFRP2, SHISA4, SLC2A4, TBCEL, THEM5, TMEM158, TMIGD3, TSNAXIP1, UBXN10, USP12, ZMAT4 [37] |
| Cancer, Organismal Injury and Abnormalities | Extrapaneatic malignant tumor           | 0.00877               | ACKR2, ARHGAP42, ARHGEF37, ARL4A, DEFA1 (includes others), DYRK3, FAM83A, FGFR2, GOLGA8K (includes others), GSTM1, HBA1/HBA2, HEPACAM2, IFI27, IFI44L, ITLN1, LPL, LRRC2, OTOF, PAQR9, PRRT4, RAP1GAP, RBFOX2, RNF182, RUNDC3A, SFRP2, SHISA4, SLC2A4, TBCEL, THEM5, TMEM158, TMIGD3, TSNAXIP1, UBXN10, USP12, ZMAT4 [35]               |
| Cancer, Organismal Injury and Abnormalities | Abdominal carcinoma                     | 0.00312               | ACKR2, ARHGAP42, ARHGEF37, ARL4A, DEFA1 (includes others), DYRK3, FAM83A, FGFR2, GOLGA8K (includes others), GSTM1, HBA1/HBA2, HEPACAM2, IFI27, IFI44L, ITLN1, LPL, LRRC2, OTOF, PAQR9, PRRT4, RAP1GAP, RBFOX2, RNF182, RUNDC3A, SFRP2, SHISA4, SLC2A4, TBCEL, TMEM158, TMIGD3, TSNAXIP1, UBXN10, USP12, ZMAT4 [34]                      |
| Cancer, Organismal Injury and Abnormalities | Intraabdominal organ tumor              | 0.00655               | ACKR2, ARHGAP42, ARHGEF37, ARL4A, DEFA1 (includes others), DYRK3, FAM83A, FGFR2, GOLGA8K (includes others), GSTM1, HBA1/HBA2, HEPACAM2, IFI27, IFI44L, ITLN1, LPL, LRRC2, OTOF, PAQR9, PRRT4, RAP1GAP, RBFOX2,                                                                                                                          |

|                                                                                     |                                     |          |                                                                                                                                                                                                                                                                                                                                                                                                          |
|-------------------------------------------------------------------------------------|-------------------------------------|----------|----------------------------------------------------------------------------------------------------------------------------------------------------------------------------------------------------------------------------------------------------------------------------------------------------------------------------------------------------------------------------------------------------------|
| Cancer, Gastrointestinal Disease, Organismal Injury and Abnormalities               | Digestive system cancer             | 0.0175   | RNF182, RUNDC3A, SFRP2, SHISA4, SLC2A4, TBCEL, TMEM158, TMIGD3, TSNAXIP1, UBXN10, USP12, ZMAT4 [34] ACKR2, ARHGAP42, ARHGEF37, DEFA1 (includes others), DYRK3, FAM83A, FGFR2, GOLGA8K (includes others), GSTM1, HBA1/HBA2, HEPACAM2, IFI27, IFI44L, LPL, LRRC2, OTOF, PAQR9, PRRT4, RAP1GAP, RBFOX2, RNF182, RUNDC3A, SFRP2, SHISA4, SLC2A4, TBCEL, TMEM158, TMIGD3, TSNAXIP1, UBXN10, USP12, ZMAT4 [32] |
| Cancer, Organismal Injury and Abnormalities                                         | Melanoma                            | 0.000895 | ACKR2, ARHGAP42, ARHGEF37, ART4, DEFA1 (includes others), DYRK3, FAM83A, FGFR2, GOLGA8K (includes others), GSTM1, HEPACAM2, IFI44L, ITLN1, LPL, LRRC2, OTOF, PRRT4, RAP1GAP, RBFOX2, RNF152, RNF182, RUNDC3A, SHISA4, SLC2A4, TBCEL, TMIGD3, TSNAXIP1, UBXN10, USP12, ZMAT4 [30]                                                                                                                         |
| Cancer, Organismal Injury and Abnormalities                                         | Head and neck cancer                | 0.0227   | ARHGAP42, ARHGEF37, ARL4A, DEFA1 (includes others), FAM83A, FGFR2, GOLGA8K (includes others), GSTM1, HEPACAM2, IFI27, IFI44L, ITLN1, LPL, LRRC2, OTOF, PAQR9, PRRT4, RAP1GAP, RBFOX2, RUNDC3A, SFRP2, SHISA4, SLC2A4, TBCEL, THEM5, TMEM158, TMIGD3, TSNAXIP1, USP12, ZMAT4 [30]                                                                                                                         |
| Cancer, Dermatological Diseases and Conditions, Organismal Injury and Abnormalities | Skin cancer                         | 0.00201  | ACKR2, ARHGAP42, ARHGEF37, ART4, DEFA1 (includes others), DYRK3, FAM83A, FGFR2, GSTM1, HEPACAM2, IFI27, IFI44L, ITLN1, LPL, LRRC2, OTOF, PAQR9, PRRT4, RAP1GAP, RNF152, RNF182, RUNDC3A, SLC2A4, TBCEL, TMIGD3, TSNAXIP1, UBXN10, USP12, ZMAT4 [29]                                                                                                                                                      |
| Cancer, Organismal Injury and Abnormalities                                         | Anogenital cancer                   | 0.00427  | ARHGAP42, ARHGEF37, ARL4A, DEFA1 (includes others), DYRK3, FGFR2, GOLGA8K (includes others), GSTM1, HBA1/HBA2, HEPACAM2, IFI27, IFI44L, ITLN1, LPL, LRRC2, OTOF, PAQR9, PRRT4, RAP1GAP, RBFOX2, RUNDC3A, SFRP2, SLC2A4, TMEM158, TMIGD3, TSNAXIP1, USP12, ZMAT4 [28]                                                                                                                                     |
| Cancer, Organismal Injury and Abnormalities                                         | Malignant genitourinary solid tumor | 0.0153   | ARHGAP42, ARHGEF37, ARL4A, DEFA1 (includes others), DYRK3, FGFR2, GOLGA8K (includes others), GSTM1, HBA1/HBA2, HEPACAM2, IFI27, IFI44L, ITLN1, LPL, LRRC2, OTOF, PAQR9, PRRT4, RAP1GAP, RBFOX2, RUNDC3A,                                                                                                                                                                                                 |

|                                                                                     |                          |         |                                                                                                                                                                                                                                                                                               |
|-------------------------------------------------------------------------------------|--------------------------|---------|-----------------------------------------------------------------------------------------------------------------------------------------------------------------------------------------------------------------------------------------------------------------------------------------------|
| Cancer, Dermatological Diseases and Conditions, Organismal Injury and Abnormalities | Cutaneous melanoma       | 0.0104  | SFRP2, SLC2A4, TMEM158, TMIGD3, TSNAXIP1, USP12, ZMAT4 [28]<br>ACKR2, ARHGAP42, ARHGEF37, ART4, DEFA1 (includes others), DYRK3, FAM83A, FGFR2, HEPACAM2, IFI44L, ITLN1, LPL, LRRC2, OTOF, PRRT4, RAP1GAP, RNF152, RNF182, RUNDC3A, SLC2A4, TBCEL, TMIGD3, TSNAXIP1, UBXN10, USP12, ZMAT4 [26] |
| Cancer, Organismal Injury and Abnormalities                                         | Multiple cancers         | 0.0113  | DYRK3, FGFR2, GOLGA8K (includes others), GSTM1, HBA1/HBA2, IFI27, IFI44L, ITLN1, LPL, OTOF, RAP1GAP, RUNDC3A, SFRP2, SLC2A4, TMEM158, TMIGD3, TSNAXIP1, USP12 [18]                                                                                                                            |
| Cancer, Organismal Injury and Abnormalities, Respiratory Disease                    | Lung carcinoma           | 0.0143  | ACKR2, ARHGAP42, FAM83A, FGFR2, GOLGA8K (includes others), GSTM1, IFI27, IFI44L, ITLN1, OTOF, PRRT4, SFRP2, SLC2A4, TMIGD3, TSNAXIP1, USP12, ZMAT4 [17]                                                                                                                                       |
| Cancer, Organismal Injury and Abnormalities, Reproductive System Disease            | Breast or ovarian cancer | 0.0197  | DYRK3, FGFR2, GSTM1, HBA1/HBA2, IFI27, IFI44L, ITLN1, LPL, OTOF, RAP1GAP, RUNDC3A, SFRP2, SLC2A4, TMEM158, TMIGD3, TSNAXIP1, USP12 [17]                                                                                                                                                       |
| Cancer, Organismal Injury and Abnormalities, Reproductive System Disease            | Prostate cancer          | 0.023   | ARHGAP42, ARHGEF37, DEFA1 (includes others), DYRK3, FGFR2, GOLGA8K (includes others), HBA1/HBA2, HEPACAM2, IFI44L, LRRC2, OTOF, PRRT4, SLC2A4, TSNAXIP1, ZMAT4 [15]                                                                                                                           |
| Cancer, Neurological Disease, Organismal Injury and Abnormalities                   | Brain cancer             | 0.00241 | ARHGAP42, ARHGEF37, FAM83A, FGFR2, LPL, OTOF, PRRT4, RAP1GAP, SFRP2, SHISA4, SLC2A4, TBCEL, THEM5, TSNAXIP1 [14]                                                                                                                                                                              |
| Cancer, Organismal Injury and Abnormalities, Reproductive System Disease            | Breast cancer            | 0.0201  | DYRK3, FGFR2, GSTM1, HBA1/HBA2, IFI44L, LPL, OTOF, RAP1GAP, RUNDC3A, SFRP2, SLC2A4, TMEM158, TSNAXIP1, USP12 [14]                                                                                                                                                                             |
| Cancer, Neurological Disease, Organismal Injury and Abnormalities                   | Gliomatosis cerebri      | 0.00385 | ARHGAP42, ARHGEF37, FAM83A, LPL, OTOF, PRRT4, RAP1GAP, SFRP2, SHISA4, SLC2A4, TBCEL, THEM5, TSNAXIP1 [13]                                                                                                                                                                                     |
| Infectious Diseases, Organismal Injury and Abnormalities                            | Viral Infection          | 0.0199  | DEFA1 (includes others), FGFR2, GSTM1, HBA1/HBA2, IFI27, IFI44L, ITLN1, LPL, SLC2A4, THEM5 [10]                                                                                                                                                                                               |
| Inflammatory Response, Organismal Injury and Abnormalities                          | Inflammation of organ    | 0.0152  | ACKR2, DEFA1 (includes others), FGFR2, GSTM1, HBA1/HBA2, IFI27, IFI44L, LPL, SLC2A4 [9]                                                                                                                                                                                                       |

|                                                                                                                          |                                            |          |                                                                                  |
|--------------------------------------------------------------------------------------------------------------------------|--------------------------------------------|----------|----------------------------------------------------------------------------------|
| Infectious Diseases, Organismal Injury and Abnormalities                                                                 | Infection by RNA virus                     | 0.0086   | DEFA1 (includes others), GSTM1, HBA1/HBA2, IFI27, IFI44L, LPL, SLC2A4, THEM5 [8] |
| Infectious Diseases, Organismal Injury and Abnormalities                                                                 | COVID-19                                   | 0.000545 | GSTM1, HBA1/HBA2, IFI27, IFI44L, SLC2A4, THEM5 [6]                               |
| Dermatological Diseases and Conditions, Inflammatory Disease, Inflammatory Response, Organismal Injury and Abnormalities | Dermatitis                                 | 0.000953 | ACKR2, DEFA1 (includes others), IFI27, IFI44L, LPL, SLC2A4 [6]                   |
| Endocrine System Disorders, Gastrointestinal Disease, Metabolic Disease, Organismal Injury and Abnormalities             | Non-insulin-dependent diabetes mellitus    | 0.00102  | HBA1/HBA2, ITLN1, LPL, SLC2A4, USP12, ZMAT4 [6]                                  |
| Dermatological Diseases and Conditions, Organismal Injury and Abnormalities                                              | Psoriasis                                  | 0.00159  | ACKR2, DEFA1 (includes others), FGFR2, GSTM1, IFI27, IFI44L [6]                  |
| Connective Tissue Development and Function, Tissue Morphology                                                            | Quantity of connective tissue              | 0.0158   | DYRK3, FGFR2, HBA1/HBA2, LPL, SLC2A4 [5]                                         |
| Cellular Development, Connective Tissue Development and Function, Tissue Development                                     | Differentiation of connective tissue cells | 0.0227   | ARL4A, FGFR2, LPL, SFRP2, SLC2A4 [5]                                             |
| Organismal Injury and Abnormalities, Renal and Urological Disease                                                        | Renal impairment                           | 0.00328  | GSTM1, HBA1/HBA2, LPL, SLC2A4 [4]                                                |
| Organismal Injury and Abnormalities, Renal and Urological Disease                                                        | Chronic kidney disease                     | 0.00391  | GSTM1, HBA1/HBA2, LPL, SLC2A4 [4]                                                |
| Cellular Development, Connective Tissue Development and Function, Tissue Development                                     | Differentiation of adipocytes              | 0.00486  | ARL4A, LPL, SFRP2, SLC2A4 [4]                                                    |
| Cancer, Hematological Disease, Immunological                                                                             | Plasma cell myeloma                        | 0.0127   | FGFR2, GOLGA8K (includes others), LPL, USP12 [4]                                 |



|                                                                                                                                                             |                                         |            |                                                  |
|-------------------------------------------------------------------------------------------------------------------------------------------------------------|-----------------------------------------|------------|--------------------------------------------------|
| Disease, Organismal Injury and Abnormalities                                                                                                                |                                         |            |                                                  |
| Gastrointestinal Disease, Hepatic System Disease, Metabolic Disease, Organismal Injury and Abnormalities                                                    | Hepatic steatosis                       | 0.0134     | FGFR2, LPL, SLC2A4, THEM5 [4]                    |
| Organismal Injury and Abnormalities                                                                                                                         | Idiopathic fibrosis                     | 0.0145     | DEFA1 (includes others), FGFR2, IFI27, SFRP2 [4] |
| Cell-To-Cell Signaling and Interaction                                                                                                                      | Binding of tumor cell lines             | 0.0173     | FGFR2, ITLN1, LPL, RAP1GAP [4]                   |
| Immunological Disease, Inflammatory Disease, Organismal Injury and Abnormalities                                                                            | Systemic lupus erythematosus            | 0.0202     | GSTM1, IFI27, IFI44L, SLC2A4 [4]                 |
| Hereditary Disorder, Metabolic Disease, Organismal Injury and Abnormalities                                                                                 | ATAD3A-related type I interferonopathy  | 0.00000709 | IFI27, IFI44L, OTOF [3]                          |
| Nutritional Disease, Organismal Injury and Abnormalities                                                                                                    | Undernutrition                          | 0.000261   | FGFR2, HBA1/HBA2, SLC2A4 [3]                     |
| Cell-To-Cell Signaling and Interaction                                                                                                                      | Binding of colorectal cancer cell lines | 0.000313   | FGFR2, ITLN1, RAP1GAP [3]                        |
| Cancer, Dermatological Diseases and Conditions, Organismal Injury and Abnormalities                                                                         | Development of skin tumor               | 0.000422   | ACKR2, FGFR2, GSTM1 [3]                          |
| Cellular Movement, Hematological System Development and Function, Immune Cell Trafficking, Inflammatory Response, Lymphoid Tissue Structure and Development | Chemotaxis of lymphocytes               | 0.00199    | ACKR2, DEFA1 (includes others), RAP1GAP [3]      |
| Cell Death and Survival                                                                                                                                     | Cell survival of tumor cell lines       | 0.00249    | DYRK3, FGFR2, GSTM1 [3]                          |
| Infectious Diseases, Organismal Injury and Abnormalities                                                                                                    | Severe COVID-19                         | 0.0037     | IFI27, IFI44L, SLC2A4 [3]                        |
| Organismal Injury and Abnormalities, Renal                                                                                                                  | Chronic renal impairment                | 0.00722    | GSTM1, LPL, SLC2A4 [3]                           |

|                                                                                                                                                 |                             |         |                                         |
|-------------------------------------------------------------------------------------------------------------------------------------------------|-----------------------------|---------|-----------------------------------------|
| and Urological Disease                                                                                                                          |                             |         |                                         |
| Cardiovascular Disease, Organismal Injury and Abnormalities                                                                                     | Ischemia of heart           | 0.00845 | GSTM1, LPL, SLC2A4 [3]                  |
| Cardiovascular Disease, Organismal Injury and Abnormalities                                                                                     | Peripheral arterial disease | 0.0113  | HBA1/HBA2, LPL, SLC2A4 [3]              |
| Cancer, Organismal Injury and Abnormalities                                                                                                     | Advanced adenocarcinoma     | 0.0154  | FGFR2, ITLN1, SLC2A4 [3]                |
| Dermatological Diseases and Conditions, Immunological Disease, Inflammatory Disease, Inflammatory Response, Organismal Injury and Abnormalities | Atopic dermatitis           | 0.0158  | DEFA1 (includes others), IFI27, LPL [3] |
| Organismal Injury and Abnormalities, Renal and Urological Disease                                                                               | Failure of kidney           | 0.0175  | GSTM1, HBA1/HBA2, SLC2A4 [3]            |
| Hematological Disease, Metabolic Disease, Organismal Injury and Abnormalities                                                                   | Dysglycemia                 | 0.0187  | FGFR2, LPL, SLC2A4 [3]                  |
| Carbohydrate Metabolism, Molecular Transport, Small Molecule Biochemistry                                                                       | Uptake of D-glucose         | 0.0188  | FGFR2, LPL, SLC2A4 [3]                  |
| Cardiovascular Disease, Organismal Injury and Abnormalities, Skeletal and Muscular Disorders                                                    | Myocardial infarction       | 0.0203  | GSTM1, LPL, SLC2A4 [3]                  |

---

\*Abbreviations: IPA=Ingenuity Pathway Analysis, PAT=Predicted aneurysm trajectory

## Supplemental Figures

### *Supplemental Figure S1*

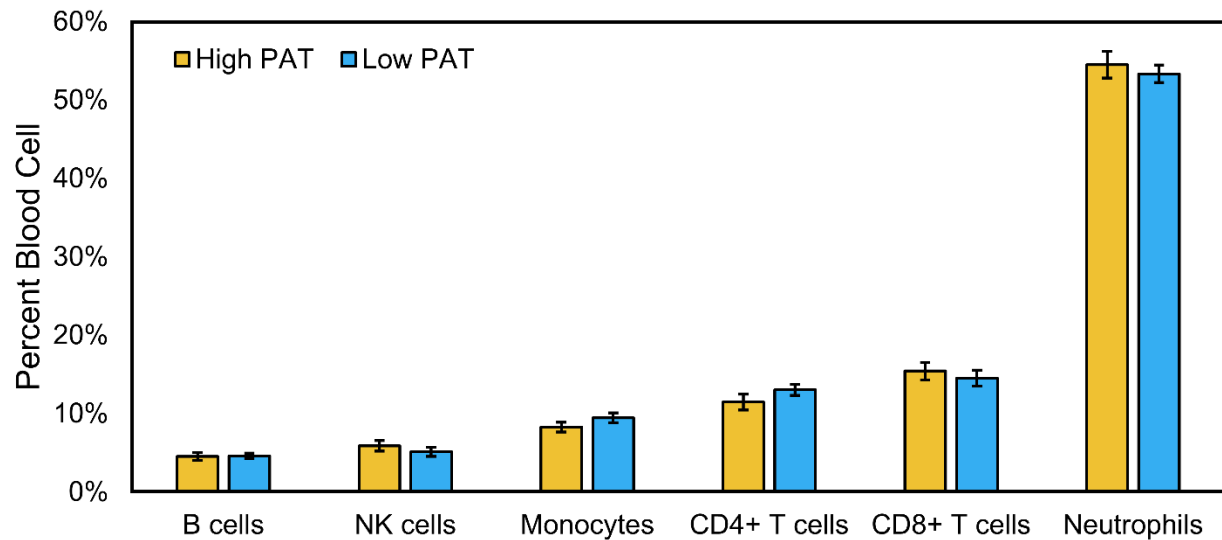

**Supplemental Figure S1. CIBERSORT Deconvolution.** In both “stable” (low PAT) and “growing” (high PAT) IA groups, neutrophils comprised the majority of the signal, followed by CD8 T cells, CD4 T cells, monocytes, natural killer cells, and B cells. There were no statistically significant differences in percent blood cells between the two groups. (Abbreviations: NK=natural killer)

*Supplemental Figure S2*

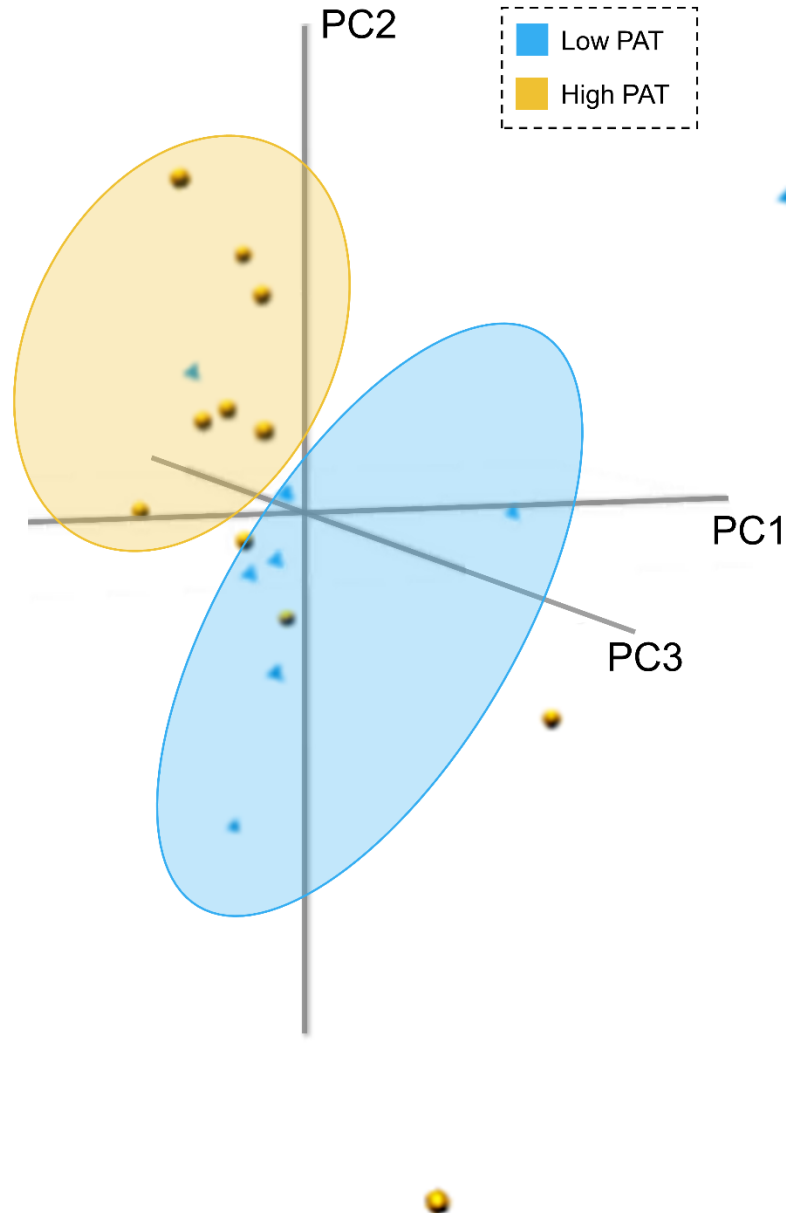

**Supplemental Figure S2. PCA Based on DEG Levels in the Testing Dataset.** The three-dimensional principal component analysis using expression of PAT-associated DEGs in testing dataset reflects modest separation between low-risk (“stable”) and high-risk (“growing”) IAs. (Abbreviations: PC=principal component, PAT=predicted aneurysm trajectory, DEG=differentially expressed gene)
